# Supplementary material for: PKA mediates modality-specific modulation of the mechanically gated ion channel PIEZO2
Source: J Biol Chem. 2023 May 4;299(6):104782. doi: 10.1016/j.jbc.2023.104782 (PMC10240422; doi:10.1016/j.jbc.2023.104782)
Supplement: Supplemental Figures S1–S5, Tables S1 and S2 [file mmc1.pdf]

## **Supporting Information**

**Title: „ Protein kinase A mediates modality-specific modulation of the mechanically-gated ion channel PIEZO2”**

### **Authors**

Irina Schaefer, Clement Verkest, Lucas Vespermann, Thomas Mair, Hannah Voß, Nadja Zeitzschel & Stefan G. Lechner

### **Content**

Figure S1

Figure S2

Figure S3

Figure S4

Figure S5

Table S1

Table S2

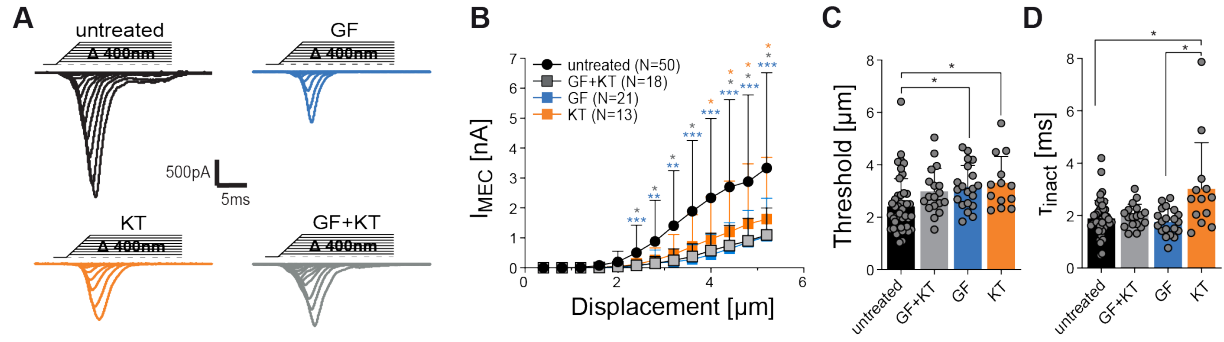

**Figure S1.** Basal PKA and PKC activity modulated poking-evoked PIEZO2 currents. **(A)** Representative example traces from PIEZO2 currents from untreated cells (top left, black), treated with only the PKC inhibitor GF109203X (top right, blue), with only the PKA inhibitor KT5720 (bottom left, orange) or with both inhibitors (bottom right, grey). **(B)** Displacement-responses curves of peak current amplitudes of PIEZO2 from untreated (black) cells and cells treated with the PKC inhibitor GF109203X (blue), the PKA inhibitor KT5720 (orange) or both (grey). Data are presented as the mean  $\pm$  SD. Number of cells per group is indicated in the legend. Comparison with Kruskal Wallis and Dunn's post test,  $p < 0.05$  \*,  $p < 0.001$  \*\*,  $p < 0.0001$  \*\*\*, untreated vs treated. **(C)** Mechanical activation thresholds from PIEZO2 untreated and treated cells. Data are presented as the mean  $\pm$  SD with individual values. Number of cells are identical to (B). Comparison with Kruskal Wallis test,  $p = 0.0019$ , and with Dunn's posttest,  $p = 0.0121$  untreated vs GF,  $p = 0.022$  untreated vs KT. **(D)** Inactivation time constants ( $\tau_{\text{inact}}$ ) of PIEZO2 untreated and treated cells. Data are presented as the mean  $\pm$  SD with individual values. Number of cells are identical to (B). Comparison with Kruskal Wallis test,  $p = 0.0112$ , and with Dunn's posttest,  $p = 0.029$  untreated vs KT,  $p = 0.0171$  GF vs KT.

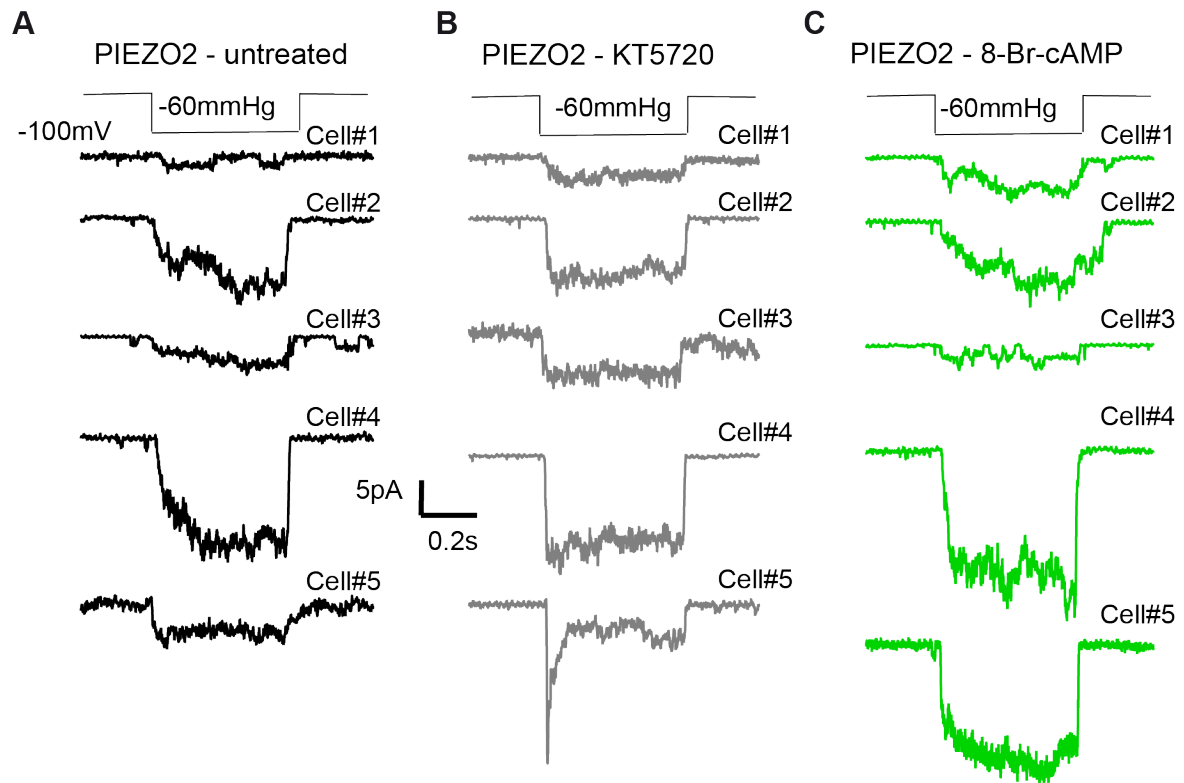

**Figure S2.** PIEZO2-dependent stretch-activated currents under the different PKA treatment conditions. **(A-C)** Representative PIEZO2 stretch-activated current evoked by a -60mmHg negative pressure pulses applied to N2a-P1KO cell patches (5 different cells per condition) in the absence (black, A) or presence of the PKA inhibitor KT5720 (grey, B) and the PKA activator 8-Br-cAMP (green, C).

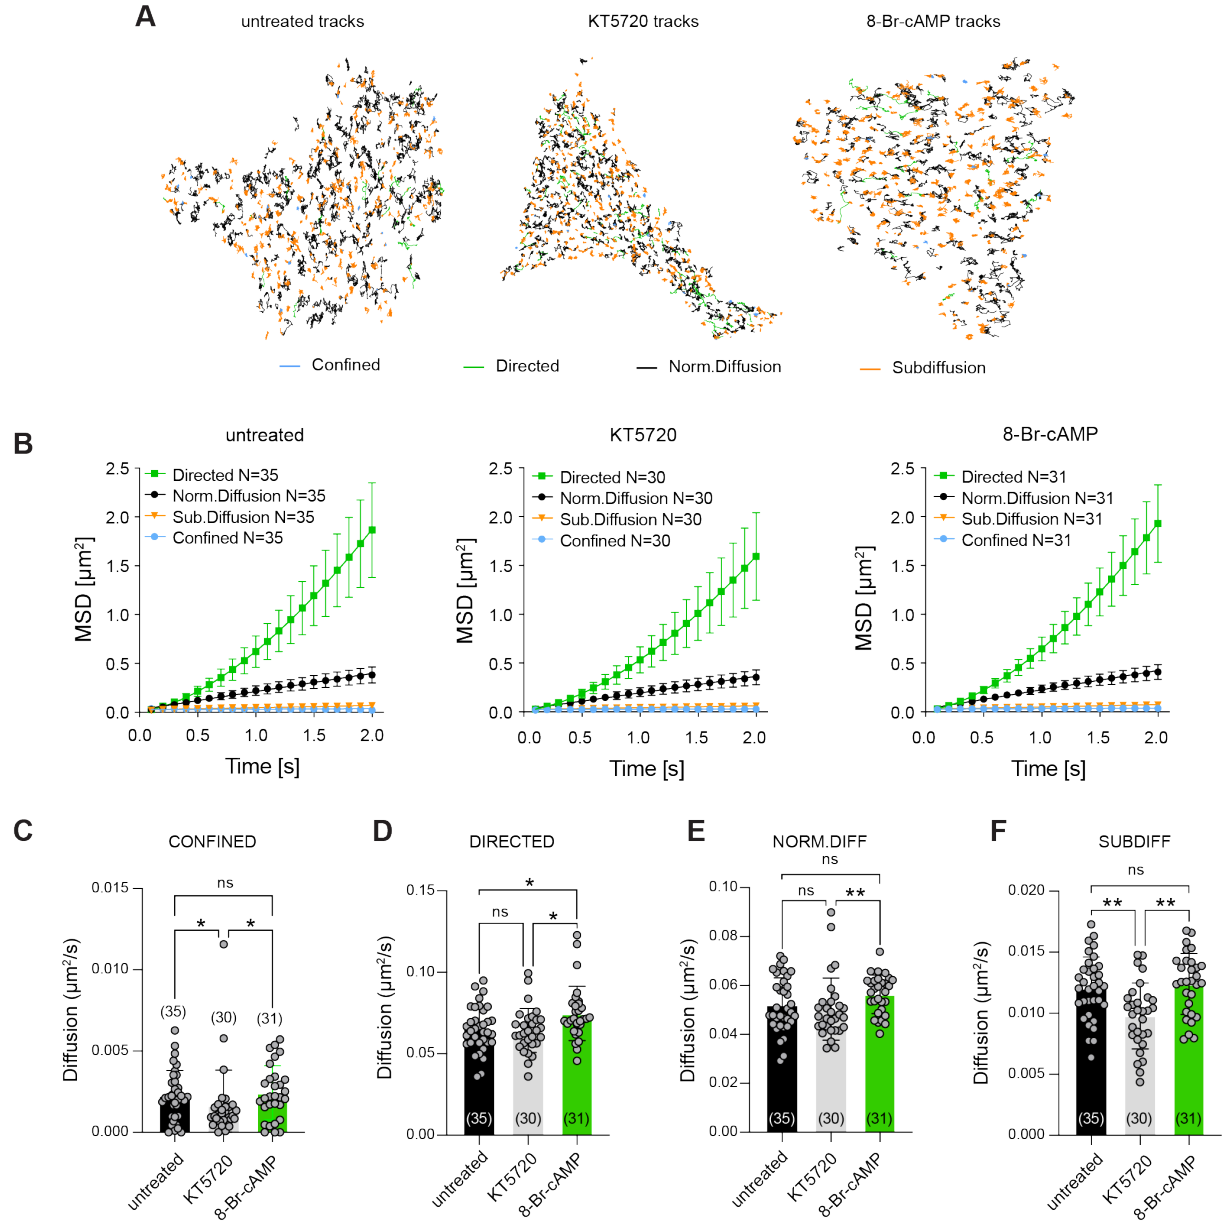

**Figure S3.** PKA modulation slightly influences PIEZO2mScarlet clusters diffusion. **(A)** Plot of the PIEZO2mScarlet cluster tracks recorded from the 3 different cells shown in figure 5 (A) during 30 seconds, with the different type of trajectories represented. Only tracks that could be followed for 40 frames (4 seconds) are displayed. **(B)** Plots of the Mean-Squared-Displacement (MSD) as a function of lag time for the 4 track categories and for PIEZO2 untreated cells (left) or treated with KT5720 (middle) and 8-Br-cAMP (right). Symbols represent means  $\pm$  SD from the indicated number of cells. **(C, D, E, F)** Diffusion coefficients of individual PIEZO2mScarlet clusters in the 3 different PKA treatment conditions from the different track categories: confined (C), directed (D), normal diffusion (E) and subdiffusion (F). Data are presented as the mean  $\pm$  SD with individual values. Number of cells is indicated within each bars. For Directed, comparison with Kruskal Wallis test,  $p=0.0114$ , and with Dunn's post test  $p=0.044$  CTL vs 8Br,  $p=0.018$  KT5720 vs 8Br,  $p>0.999$  CTL vs KT5720. For Confined, comparison with Kruskal Wallis test,  $p=0.0089$ , and with Dunn's post test  $p>0.999$  CTL vs 8Br,  $p=0.0177$  KT5720 vs 8Br,  $p>0.0286$  CTL vs KT5720. For Normal diffusion, comparison with Kruskal Wallis test,  $p=0.012$ , and with Dunn's post test  $p=0.213$  CTL vs 8Br,  $p=0.009$  KT5720 vs 8Br,  $p=0.0619$  CTL vs KT5720. For Subdiffusion, comparison with Kruskal Wallis test,  $p=0.0007$ , and with Dunn's post test  $p>0.999$  CTL vs 8Br,  $p=0.0013$  KT5720 vs 8Br,  $p>0.0065$  CTL vs KT5720.

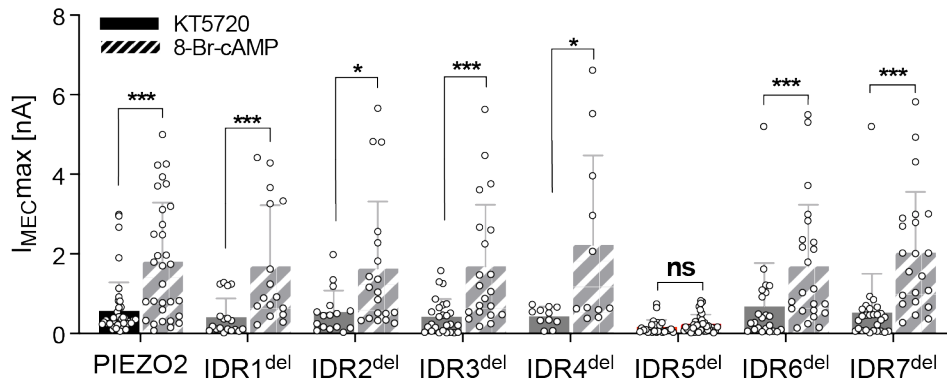

**Figure S4.** Pairwise comparison of the maximal current amplitudes of mechanically evoked current recorded from N2a-PIEZO1-KO cells transfected with the indicated mutants and treated with either the PKA inhibitor KT5720 (solid bars) or the PKA activator 8-Br-cAMP (cross hatched bars). Bars represent means  $\pm$  SD and data from individual cells are shown as white dots. Data were compared using multiple Mann-Whitney tests: PIEZO2 ( $N_{KT} = 44$ ,  $N_{8Br} = 31$ ;  $P = 0.000036$ ), IDR1<sup>del</sup> ( $N_{KT} = 18$ ,  $N_{8Br} = 16$ ;  $P = 0.000376$ ), IDR2<sup>del</sup> ( $N_{KT} = 16$ ,  $N_{8Br} = 19$ ;  $P = 0.011088$ ), IDR3<sup>del</sup> ( $N_{KT} = 26$ ,  $N_{8Br} = 21$ ;  $P = 0.000088$ ), IDR4<sup>del</sup> ( $N_{KT} = 11$ ,  $N_{8Br} = 11$ ;  $P = 0.015769$ ), IDR5<sup>del</sup> ( $N_{KT} = 25$ ,  $N_{8Br} = 36$ ;  $P = 0.082236$ ), IDR6<sup>del</sup> ( $N_{KT} = 23$ ,  $N_{8Br} = 23$ ;  $P = 0.000917$ ), IDR7<sup>del</sup> ( $N_{KT} = 27$ ,  $N_{8Br} = 22$ ;  $P = 0.0000005$ ).

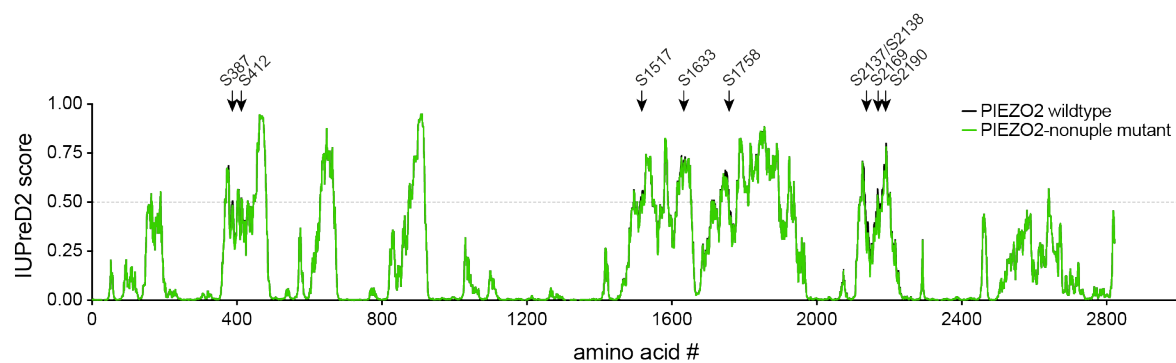

**Figure S5.** mPIEZO2 (black) and mPIEZO2-9MUT (green) amino acid sequence-based disorder predictions (bottom) determined using IUPRED2A. Positions of the amino acids that were substituted by alanines in the 9-fold mutant are indicated above the graph. Note, alanine substitution does not cause noteworthy changes in the level of intrinsic disorder.

| Domain              | Amino acid   | Consensus sequence       | NetPhos3.1 [score] | GPS [score]   | Conservation |
|---------------------|--------------|--------------------------|--------------------|---------------|--------------|
| TM5-pre- $\alpha$ 1 | S206         | RRFA <b>S</b> VASK       | 0.599              | 1.96          | 46.4         |
| IDR6                | <b>S387</b>  | <b>ERRR<b>S</b>LWYA</b>  | <b>0.883</b>       | <b>4.872</b>  | <b>58.9</b>  |
|                     | S412         | DYKP <b>S</b> DGLL       | 0.711              |               | 78           |
|                     | S432         | TIHP <b>S</b> LPIE       | 0.577              |               | 64.5         |
|                     | S472         | KRED <b>S</b> ELEG       | 0.553              |               | 30.9         |
| IDR4                | S856         | HPEG <b>S</b> LPDL       | 0.546              |               | 96.4         |
| IDR3                | <b>S1517</b> | <b>ERML<b>S</b>LTQE</b>  | <b>0.845</b>       | <b>23.296</b> | <b>97.4</b>  |
|                     | S1594        | PPRK <b>S</b> AFQF       | 0.711              |               | 99.5         |
|                     | <b>S1633</b> | <b>RRKG<b>S</b>GDGP</b>  | <b>0.796</b>       | <b>3.667</b>  | <b>62.4</b>  |
|                     | S1652        | VKKK <b>S</b> DGPD       | 0.575              | 3.803         | 83.2         |
| Clasp               | S1719        | PTRE <b>S</b> IHMY       | 0.727              |               | 91.4         |
| IDR2                | S1735        | LSRE <b>S</b> GLDT       | 0.558              |               | 80.4         |
|                     | <b>S1758</b> | <b>HRMD<b>S</b>LDSR</b>  | <b>0.699</b>       | <b>2.446</b>  | <b>96.6</b>  |
|                     | S1764        | DSRD <b>S</b> ISSC       | 0.535              |               | 90.8         |
|                     | T1781        | SRQST <b>L</b> DDL       | 0.621              |               | 97.2         |
|                     | S1906        | PSYSKAV <b>S</b> FEHLSFA |                    | 3.244         | 82.2         |
| IDR1                | <b>S2137</b> | <b>GRRG<b>S</b>SDSL</b>  | <b>0.857</b>       | <b>5.408</b>  | <b>81.3</b>  |
|                     | <b>S2138</b> | <b>RRG<b>S</b>DSLK</b>   | <b>0.638</b>       | <b>2.108</b>  | <b>49.5</b>  |
|                     | <b>S2169</b> | <b>RRKR<b>S</b>CSSS</b>  | <b>0.788</b>       | <b>24.078</b> | <b>91.1</b>  |
|                     | S2171        | IRRKRSC <b>S</b> SSQISPR |                    | 1.972         | 48.9         |
|                     | S2180        | SQISPR <b>S</b> SFSSNRSK |                    | 4.045         | 65.5         |
|                     | <b>S2190</b> | <b>SKRG<b>S</b>TSTR</b>  | <b>0.736</b>       | <b>3.26</b>   | <b>93.6</b>  |
|                     | T2191        | NRSKRG <b>S</b> TSTRNSSQ |                    | 3.793         | 81.2         |
|                     | S2196        | GSTSTRN <b>S</b> SQKGSSV |                    | 23.171        | 94.1         |
|                     | S2202        | NSSQKG <b>S</b> SVLSLKQK |                    | 4.044         | 93.9         |
| THU9-Anchor-linker  | S2396        | FLTK <b>S</b> YNYV       | 0.501              |               | 98.7         |
| CTD- $\alpha$ 1     | T2790        | LVRET <b>G</b> ELE       | 0.53               |               | 99.2         |
| CTD- $\alpha$ 3     | T2821        | IKWT <b>R</b> EKTN       |                    | 2.282         | 81.4         |

**Table S1.** Characteristics of the predicted PKA sites of mouse PIEZO2. The localization within defined PIEZO domain is indicated, as well as the putative phosphorylation amino acid position, the consensus sequence with the phosphosite highlighted, the respective predictive score obtained with NetPhos3.1 and GPS, as well as the conservation (%) of the phosphosite between species. Predictive site detected with both software are highlighted in bold.

| Domain             | Amino acid | Consensus sequence | NetPhos3.1 [score] | GPS [score]   | Conservation |
|--------------------|------------|--------------------|--------------------|---------------|--------------|
| <b>THU1</b>        | <b>S51</b> | PSRH <b>S</b> IPGH | <b>0.657</b>       | <b>25.876</b> | <b>38.3</b>  |
| <b>IDR6</b>        | T351       | LRKE <b>T</b> PRED |                    | 5.251         | 3.6          |
| <b>THU4-pre-α1</b> | S573       | TLLR <b>S</b> LGEL | 0.651              |               | 46.6         |
| <b>Beam</b>        | S1362      | KYRQ <b>S</b> QASR | 0.669              |               | 13.2         |
| <b>Clasp</b>       | S1500      | QRVL <b>S</b> TMQF | 0.665              |               | 45.1         |
|                    | S1531      | HRTM <b>S</b> DVLC | 0.703              |               | 95.6         |
| <b>IDR2</b>        | T1574      | GPVE <b>T</b> RDGP |                    | 4.025         | 8.3          |
|                    | T1644      | TRMR <b>T</b> ASEL | 0.576              |               | 89.9         |
|                    | S1646      | MRTA <b>S</b> ELLL | 0.674              |               | 88.6         |
| <b>IDR1</b>        | S1864      | QGKG <b>S</b> IRSK |                    | 23.56         | 4.1          |
|                    | S1887      | TRH <b>I</b> SIRFR |                    | 5.494         | 45.6         |
|                    | S1945      | RRLQ <b>S</b> FCVS | 0.692              |               | 28.8         |
| <b>CTD- α1</b>     | T2516      | LVRE <b>T</b> RELE | 0.616              |               | 90.2         |

**Table S2.** Characteristics of the predicted PKA sites of mouse PIEZO1. Characteristics of the predicted PKA sites of mouse PIEZO1. The localization within defined PIEZO domain is indicated, as well as the putative phosphorylation amino acid position, the consensus sequence with the phosphosite highlighted, the respective predictive score obtained with NetPhos3.1 and GPS, as well as the conservation (%) of the phosphosite between species. Predictive site detected with both software are highlighted in bold.
